# Supplementary material for: Intra-Amnionic Threonine Administered to Chicken Embryos Reduces Salmonella Enteritidis Cecal Counts and Improves Posthatch Intestinal Development
Source: Hindawi journal article supplement (doi:10.1155/2018/9795829), 2018-11-26
Supplement: f1 [file 9795829.f1.pdf]

1 Supplementary Table 1. Villus height (VH), crypt depth (CD), villus:crypt ratio (V:C)  
 2 and villus area (Area) of broilers at hatch and at two days of age following *in ovo* feeding  
 3 with Thr.

| Duodenum                          | Age      |          |          |          |
|-----------------------------------|----------|----------|----------|----------|
|                                   | Hatch    |          | Day 2    |          |
|                                   | NT       | T        | NT       | T        |
| VH ( $\mu\text{m}$ )              | 475.32 b | 492.03 a | 869.86 b | 977.90 a |
| CD ( $\mu\text{m}$ )              | 30.65 a  | 27.27 b  | 50.56 a  | 46.89 b  |
| V:C ( $\mu\text{m}/\mu\text{m}$ ) | 15.55 b  | 18.19 a  | 17.31 b  | 20.84 a  |
| Area ( $\text{mm}^2$ )            | 0.123 b  | 0.143 a  | 0.355 b  | 0.462 a  |
| Jejunum                           | Hatching |          | Day 2    |          |
|                                   | Control  | Thr      | Control  | Thr      |
|                                   | Control  | Thr      | Control  | Thr      |
| VH ( $\mu\text{m}$ )              | 315.03 a | 311.22 a | 501.68 b | 549.12 a |
| CD ( $\mu\text{m}$ )              | 25.00 a  | 20.86 b  | 44.96 a  | 41.78 b  |
| V:C ( $\mu\text{m}/\mu\text{m}$ ) | 12.76 b  | 14.98 a  | 12.08 b  | 13.96 a  |
| Area ( $\text{mm}^2$ )            | 0.064 a  | 0.065 a  | 0.186 a  | 0.190 a  |

4 Means followed by the same letter within the same column did not significantly differ by the F test at  $p \leq 0.05$ .

5

6

7

8  
9

10 Supplementary Table 2. Villus height (VH), crypt depth (CD), villus:crypt ratio (V:C)  
11 and villus area (Area) of broilers supplemented with Thr *in ovo*, 24 hours post-inoculated  
12 with *Salmonella* Enteritidis (hpi).

| Duodenum  |                      |                      |                                   |                        |
|-----------|----------------------|----------------------|-----------------------------------|------------------------|
| Treatment | VH ( $\mu\text{m}$ ) | CD ( $\mu\text{m}$ ) | V:C ( $\mu\text{m}/\mu\text{m}$ ) | Area ( $\text{mm}^2$ ) |
| NT-SHAM   | 1210.18 b            | 61.92 b              | 19.57 b                           | 0.574 b                |
| NT-SE     | 1045.81 c            | 72.95 a              | 14.41 d                           | 0.462 c                |
| T-SHAM    | 1325.76 a            | 57.24 c              | 23.28 a                           | 0.702 a                |
| T-SE      | 1181.14 b            | 63.33 b              | 18.75 c                           | 0.608 b                |

  

| Jejunum   |                      |                      |                                   |                        |
|-----------|----------------------|----------------------|-----------------------------------|------------------------|
| Treatment | VH ( $\mu\text{m}$ ) | CD ( $\mu\text{m}$ ) | V:C ( $\mu\text{m}/\mu\text{m}$ ) | Area ( $\text{mm}^2$ ) |
| NT-SHAM   | 577.58 b             | 52.89 b              | 11.01 a                           | 0.215 b                |
| NT-SE     | 541.81 c             | 60.86 a              | 9.15 c                            | 0.203 b                |
| T-SHAM    | 624.34 a             | 57.21 ab             | 10.93 ab                          | 0.267 a                |
| T-SE      | 620.18 a             | 60.33 a              | 10.41 b                           | 0.251 a                |

13 Means followed by the same letter within the same column and tissue did not significantly differ by Tukey's  
14 test at  $p \leq 0.05$ . NT-SHAM: no *in ovo* Thr supplementation and sham-inoculated in the post-hatch challenge;  
15 T-SHAM: *in ovo* Thr supplementation and sham-inoculated; NT-SE: no *in ovo* Thr supplementation and  
16 SE Nal<sup>R</sup>-challenged; and T-SE: *in ovo* Thr supplementation and SE Nal<sup>R</sup>-challenged.

17  
18

19 Supplementary Table 3. Villus height (VH), crypt depth (CD), villus:crypt ratio (V:C)  
 20 and villus area (Area) of broilers supplemented with Thr *in ovo*, 96 hours post-inoculated  
 21 with *Salmonella* Enteritidis (hpi).

| Duodenum  |                      |                      |                                   |                        |
|-----------|----------------------|----------------------|-----------------------------------|------------------------|
| Treatment | VH ( $\mu\text{m}$ ) | CD ( $\mu\text{m}$ ) | V:C ( $\mu\text{m}/\mu\text{m}$ ) | Area ( $\text{mm}^2$ ) |
| NT-SHAM   | 1423.01 a            | 56.75 c              | 25.58 a                           | 0.739 a                |
| NT-SE     | 1274.78 b            | 72.62 b              | 17.78 d                           | 0.625 b                |
| T-SHAM    | 1440.31 a            | 69.47 b              | 21.82 b                           | 0.741 a                |
| T-SE      | 1338.33 a            | 84.36 a              | 20.18 c                           | 0.675 ab               |
| Jejunum   |                      |                      |                                   |                        |
| NT-SHAM   | 840.36 a             | 56.96 b              | 14.55 b                           | 0.392 ab               |
| NT-SE     | 816.92 b             | 62.52 a              | 13.53 c                           | 0.363 b                |
| T-SHAM    | 864.03 a             | 52.24 b              | 16.44 a                           | 0.430 a                |
| T-SE      | 822.87 ab            | 54.92 b              | 14.94 b                           | 0.382 ab               |

22 Means followed by the same letter within the same column and tissue did not significantly differ by Tukey's  
 23 test at  $p \leq 0.05$ . NT-SHAM: no *in ovo* Thr supplementation and sham-inoculated in the post-hatch challenge;  
 24 T-SHAM: *in ovo* Thr supplementation and sham-inoculated; NT-SE: no *in ovo* Thr supplementation and  
 25 SE Nal<sup>R</sup>-challenged; and T-SE: *in ovo* Thr supplementation and SE Nal<sup>R</sup>-challenged.

26  
 27

28

29

30 Supplementary Table 4. Villus height (VH), crypt depth (CD), villus:crypt ratio (V:C)  
 31 and villus area (Area) of broilers supplemented with Thr *in ovo*, 168 hours post-inoculated  
 32 with *Salmonella* Enteritidis (dpi).

| Duodenum  |                      |                      |                                   |                        |
|-----------|----------------------|----------------------|-----------------------------------|------------------------|
| Treatment | VH ( $\mu\text{m}$ ) | CD ( $\mu\text{m}$ ) | V:C ( $\mu\text{m}/\mu\text{m}$ ) | Area ( $\text{mm}^2$ ) |
| NT-SHAM   | 1600.14 a            | 94.26 a              | 16.48 b                           | 0.999 a                |
| NT-SE     | 1442.26 b            | 98.54 a              | 15.73 b                           | 0.755 b                |
| T-SHAM    | 1622.46 a            | 82.87 b              | 19.01 a                           | 1.094 a                |
| T-SE      | 1556.54 a            | 86.20 b              | 18.94 a                           | 1.042 a                |
| Jejunum   |                      |                      |                                   |                        |
| NT-SHAM   | 995.85 a             | 80.46 a              | 12.02 bc                          | 0.549 b                |
| NT-SE     | 873.76 b             | 82.98 a              | 11.02 c                           | 0.464 c                |
| T-SHAM    | 975.41 a             | 71.38 b              | 14.11 a                           | 0.675 a                |
| T-SE      | 882.89 b             | 69.08 b              | 13.19 ab                          | 0.529 bc               |

33 Means followed by the same letter within the same column and tissue did not significantly differ by Tukey's test at  
 34  $p \leq 0.05$ . NT-SHAM: no *in ovo* Thr supplementation and sham-inoculated in the post-hatch challenge; T-  
 35 SHAM: *in ovo* Thr supplementation and sham-inoculated; NT-SE: no *in ovo* Thr supplementation and SE  
 36 Nal<sup>R</sup>-challenged; and T-SE: *in ovo* Thr supplementation and SE Nal<sup>R</sup>-challenged.

37

38

39
